# Supplementary material for: CaV3.2 T-type channels mediate Ca2+ entry during oocyte maturation and following fertilization
Source: Oxford University Press journal article supplement (doi:10.1242/jcs.180026), 2015-01-01
Supplement: jcs180026supp.pdf [file jcs180026supp.pdf]

**Table S1: Primer sequences used for real-time RT-PCR**

| <b>Gene</b>    | <b>Forward primer (5'-3')</b> | <b>Reverse primer (5'-3')</b> |
|----------------|-------------------------------|-------------------------------|
| <i>Cacnals</i> | AACGGGAGTTCTTGGGAGAG          | CCTTCAGGCATTCCTCTCTG          |
| <i>Cacnalc</i> | TCCTGGTCTGAGGAGACGAC          | GGTGGTGACCTCGATGAACT          |
| <i>Cacnald</i> | AACAAGAACAGCGACAAGCA          | AGGACACACACTGCCATTGA          |
| <i>Cacnalf</i> | GGATACCTTGGCAAACCTTGG         | CATGCATCTGCAATCTCCTG          |
| <i>Cacnala</i> | CCACCACCATCATCATCATC          | GGCTTCCACTGACGGAACTA          |
| <i>Cacnalb</i> | GATGCCCTCACTCAGTAGCC          | AATTGGCGGTCTTGTAGGTG          |
| <i>Cacnale</i> | GAGGAGTTCTCCATGGAACG          | TCCTGATCGGTGAGTGTCAG          |
| <i>Cacnalg</i> | CTCCGTCTTGTCCGTTCACT          | TGAACGTCCAAGGAGTCAGTC         |
| <i>Cacnalh</i> | GTCCAGGATGCTCTCGCTAC          | GCGAGTGAGCAGAGGTGAC           |
| <i>Cacnali</i> | GGCTCCATCTTCCACCACTA          | GTGGGGTCCTCAAGACTCAG          |
